# Supplementary material for: Antibody-mediated co-delivery of programmable drug combinations
Source: Research Square preprint supplement (doi:10.21203/rs.3.rs-5181233/v1), 2024-10-30
Supplement: Supplementary file 1 [file 004ee77b6c980884d55c528c.xlsx]

## Sheet: Table 1-cell line information
Supplementary Information Table 1 - cell lines
Cell line	Species	Cancer type	Culture medium	Source	Catalog number
MDA-MB-436	Human Cell Line	Breast cancer	DMEM/F-12K (1:1, v/v)+10% FBS	Meisen Chinese Tissue Culture Collections	CTCC-ZHYC-0030
HCC1954	Human Cell Line	Breast cancer	RPMI-1640+10% FBS	Meisen Chinese Tissue Culture Collections	CTCC-003-0205
MDA-MB-468	Human Cell Line	Breast cancer	DMEM+10% FBS	stem cell bank, Chinese Academy of Sciences	TCHu136
MDA-MB-175	Human Cell Line	Breast cancer	DMEM+10% FBS	Meisen Chinese Tissue Culture Collections	CTCC-ZHYC-0035
MDA-MB-231	Human Cell Line	Breast cancer	DMEM+10% FBS	stem cell bank, Chinese Academy of Sciences	SCSP-5043
SK-BR-3	Human Cell Line	Breast cancer	McCoy's 5A+10% FBS	ATCC	HTB-30
MCF-7	Human Cell Line	Breast cancer	DMEM+10% FBS+0.01 mg/ml human insulin	stem cell bank, Chinese Academy of Sciences	TCHu 74
T-47D	Human Cell Line	Breast cancer	DMEM+10% FBS+0.01 mg/ml human insulin	stem cell bank, Chinese Academy of Sciences	TCHu 87
BT-474	Human Cell Line	Breast cancer	RPMI-1640+10% FBS	stem cell bank, Chinese Academy of Sciences	TCHu143
MDA-MB-453	Human Cell Line	Breast cancer	DMEM+10% FBS	Meisen Chinese Tissue Culture Collections	CTCC-400-0235
COLO205	Human Cell Line	Colorectal cancer	RPMI-1640+10% FBS	ATCC	CCL-222
DLD-1	Human Cell Line	Colorectal cancer	RPMI-1640+10% FBS	ATCC	CCL-221
DLD-1-BRCA2-/-	Human Cell Line	Colorectal cancer	RPMI-1640+10% FBS	Meisen Chinese Tissue Culture Collections	CTCC-001-0902
HCT-116	Human Cell Line	Colorectal cancer	McCoy's 5A+10% FBS	ATCC	CCL-247
HCT-15	Human Cell Line	Colorectal cancer	RPMI-1640+10% FBS	ATCC	CCL-225
SW837	Human Cell Line	Colorectal cancer	DMEM+10% FBS	Nanjing Cobioer Biosciences co., ltd	CBP61285
LoVo	Human Cell Line	Colorectal cancer	F-12K+10% FBS	stem cell bank, Chinese Academy of Sciences	SCSP-514
HT-29	Human Cell Line	Colorectal cancer	McCoy's 5A+10% FBS	stem cell bank, Chinese Academy of Sciences	SCSP-5032
AGS	Human Cell Line	Gastric cancer	F-12K+10% FBS	stem cell bank, Chinese Academy of Sciences	TCHu232
N87	Human Cell Line	Gastric cancer	RPMI-1640+10% FBS	WuXi AppTec (Nantong) Co.,Ltd	NA
N87-R	Human Cell Line	Gastric cancer	RPMI-1640+10% FBS	WuXi AppTec (Nantong) Co.,Ltd	NA
U-87MG	Human Cell Line	Glioblastoma	DMEM+10% FBS	stem cell bank, Chinese Academy of Sciences	TCHu138
786-O	Human Cell Line	Kidney cancer	RPMI-1640+10% FBS	stem cell bank, Chinese Academy of Sciences	TCHu186
NCI-H2170	Human Cell Line	Lung cancer	RPMI-1640+10% FBS	NANJING COBIOER BIOSCIENCES CO., LTD	CBP60128
NCI-H1975	Human Cell Line	Lung cancer	RPMI-1640+10% FBS	stem cell bank, Chinese Academy of Sciences	SCSP-597
NCI-H460	Human Cell Line	Lung cancer	RPMI-1640+10% FBS	stem cell bank, Chinese Academy of Sciences	SCSP-584
SHP-77	Human Cell Line	Lung cancer	RPMI-1640+10% FBS	stem cell bank, Chinese Academy of Sciences	SCSP-5074
PC9	Human Cell Line	Lung cancer	RPMI-1640+10% FBS	stem cell bank, Chinese Academy of Sciences	SCSP-5085
KARPAS-422	Human Cell Line	Lymphoma	RPMI-1640+20% FBS	Meisen Chinese Tissue Culture Collections	CTCC-007-0202
A375	Human Cell Line	Melanoma	DMEM+10% FBS	stem cell bank, Chinese Academy of Sciences	TCHu155
SK-MEL-2	Human Cell Line	Melanoma	DMEM+10% FBS	stem cell bank, Chinese Academy of Sciences	TCHu257
UWB1.289	Human Cell Line	Ovarian cancer	RPMI-1640/MEGM (1:1, v/v)+3% FBS	Meisen Chinese Tissue Culture Collections	CTCC-400-0270
SK-OV-3	Human Cell Line	Ovarian cancer	McCoy's 5A+10% FBS	stem cell bank, Chinese Academy of Sciences	TCHu185
IGROV-1	Human Cell Line	Ovarian cancer	RPMI-1640+10% FBS	NANJING COBIOER BIOSCIENCES CO., LTD	CBP60837
BxPC-3	Human Cell Line	Pancreatic cancer	RPMI-1640+10% FBS	stem cell bank, Chinese Academy of Sciences	TCHu 12
Capan-1	Human Cell Line	Pancreatic cancer	DMEM+10% FBS	Meisen Chinese Tissue Culture Collections	CTCC-400-0057
AsPC-1	Human Cell Line	Pancreatic cancer	RPMI-1640+10% FBS	ATCC	CRL-1682
PANC-1	Human Cell Line	Pancreatic cancer	DMEM+10% FBS	stem cell bank, Chinese Academy of Sciences	SCSP-535
HPAF-II	Human Cell Line	Pancreatic cancer	DMEM+10% FBS	Meisen Chinese Tissue Culture Collections	CTCC-400-0258
MIA PaCa-2	Human Cell Line	Pancreatic cancer	DMEM+10% FBS+2.5% horse serum	stem cell bank, Chinese Academy of Sciences	SCSP-568
KP-4	Human Cell Line	Pancreatic cancer	RPMI-1640+10% FBS	Meisen Chinese Tissue Culture Collections	CTCC-007-0120
CWR22RV1	Human Cell Line	Prostate cancer	RPMI-1640+10% FBS	NANJING COBIOER BIOSCIENCES CO., LTD	CBP60341
LNCaP	Human Cell Line	Prostate cancer	RPMI-1640+10% FBS	stem cell bank, Chinese Academy of Sciences	TCHu173
C4-2	Human Cell Line	Prostate cancer	RPMI-1640+10% FBS	ATCC	CRL-3314
DU 145	Human Cell Line	Prostate cancer	DMEM+10% FBS	stem cell bank, Chinese Academy of Sciences	TCHu222
Clone M3	Mouse Cell Line	Melanoma	F-12K+2.5% FBS+15% horse serum	Meisen Chinese Tissue Culture Collections	CTCC-007-0520
KPC	Mouse Cell Line	Pancreatic cancer	DMEM+10% FBS
Bone marrow-CD34+ cells	Human primary cell		StemSpan SFEM II+1× Expansion supplement+1μM UM729	WuXi AppTec (Nantong) Co.,Ltd	BM34C-3

## Sheet: Table 2-small molecules
Supplementary Information Table 2 - small molecules
Full name	Type	Description	Source	Catalog number
Exatecan	Cytotoxic components	TOP1 inhibitor	MedChemExpress	HY-13631
Belotecan		TOP1 inhibitor	MedChemExpress	HY-13566A
DXd		TOP1 inhibitor	MedChemExpress	HY-13631D
SN-38		TOP1 inhibitor	MedChemExpress	HY-13704
Gemcitabine		DNA synthesis inhibitor	MedChemExpress	HY-17026
Saruparib(AZD5305)	DNA damage response inhibitors	PARP1 inhibitor	MedChemExpress	HY-132167
Huaoparib		PARP1 inhibitor	generated in-house	NA
Huaoparib-1		PARP1 inhibitor	generated in-house	NA
Rucaparib		PARP1/2 inhibitor	MedChemExpress	HY-10617A
Niraparib		PARP1/2 inhibitor	MedChemExpress	HY-10619
Veliparib		PARP1/2 inhibitor	MedChemExpress	HY-10129
Venadaparib		PARP1/2 inhibitor	MedChemExpress	HY-137457
Rabusertib		CHEK1 inhibitor	MedChemExpress	HY-14720
AZD-7762		CHEK1 inhibitor	MedChemExpress	HY-10992
Prexasertib		CHEK1 inhibitor	MedChemExpress	HY-18174
GDC-0575		CHEK1 inhibitor	MedChemExpress	HY-112167
Berzosertib(VE-822)		ATR inhibitor	MedChemExpress	HY-13902
Huavosertib		WEE1 inhibitor	generated in-house	NA
Adavosertib		WEE1 inhibitor	MedChemExpress	HY-10993
Debio 0123		WEE1 inhibitor	Selleck	S9778
Palbociclib	Targeted molecules	CDK4/6 inhibitor	MedChemExpress	HY-50767
Dinaciclib		panCDK inhibitor	MedChemExpress	HY-10492
Cobimetnib		MEK inhibitor	MedChemExpress	HY-13064
Trametinib		MEK inhibitor	MedChemExpress	HY-10999
Selumetinib		MEK inhibitor	MedChemExpress	HY-50706
GSK1790627		MEK inhibitor	MedChemExpress	HY-148507
Huametinib		MEK inhibitor	generated in-house	NA
Gedatolisib		PI3K&mTOR inhibitor	Selleck	S2628
Hualisib		PI3K&mTOR inhibitor	generated in-house	NA
Huaposertib		PLK1 inhibitor	generated in-house	NA
MRTX-1719		PRMT5 inhibitor	MedChemExpress	HY-139611
Fulvestrant		ER inhibitor	MedChemExpress	HY-13636
Elacestrant		ER inhibitor	MedChemExpress	HY-19822
Smol006	Molecular glue	GSPT1 degrader	generated in-house	NA
1V209	Autoimmune drugs	TLR7 agonist	generated in-house	NA

## Sheet: Table 3-antibodies
Supplementary Information Table 3 - antibodies
Full Name	Abbreviation	Description	Source	Catalog number
Trastuzumab	T	HER2-targeting antibody (also called Herceptin)	generated in-house	NA
thioT	thioT	HER2-targeting thiomab	generated in-house	NA
Sacituzumab	RS7	TROP2-targeting antibody	generated in-house	NA
thioRS7	thioRS7	TROP2-targeting thiomab	generated in-house	NA
Patritumab	P	HER3-targeting antibody	generated in-house	NA
Hu383	Hu383	a humanized PSMA-targeting mouse antibody	generated in-house	NA
thio383	thio383	a humanized PSMA-targeting thiomab	generated in-house	NA
Ab-010	Ab-010	a humanized B7H3-targeting mouse antibody	generated in-house	NA
thio010	thio010	a humanized B7H3-targeting thiomab	generated in-house	NA
TF mAb	TF mAb	a humanized Tissue Factor(TF/CD142)-targeting mouse antibody	generated in-house	NA
Hu517	Hu517	a humanized ROR1-targeting mouse antibody	generated in-house	NA
Ab15A	Ab15A	a mouse MUC18-targeting antibody	generated in-house	NA
CDH6 mAb	CDH6 mAb	a humanized CDH6-targeting antibody	generated in-house	NA
Hu151	Hu151	a humanized FOLR-targeting antibody	generated in-house	NA
Isotype IgG	HuIgG	Isotype control human IgG non-targeting antibody	abinvivo	B117901
thioIgG	thioIgG	Isotype control IgG non-targeting thiomab	generated in-house	NA
InVivoPlus anti-mouse PD-L1	mPD-L1	a rat IgG2b anti-mouse PD-L1 antibody for in vivo use	Bioxcell	#BP0101

## Sheet: Table 4-ADCs
Supplementary Information Table 4 - ADCs
ADC name	Alternative name	Tumor Antigen	Antibody	Antibody type	Payload (DAR)	Payload target
HER2-exatecan8	HER2-TOP1 (T-TOP1)	HER2	Trastuzumab (T)	Native	exatecan8	TOP1
TROP2-rucaparib8	TROP2-PARP1/2	TROP2	Sacituzumab (RS7)	Native	rucaparib8	PARP1/2
HER2-rucaparib8	HER2-PARP1/2	HER2	Trastuzumab (T)	Native	rucaparib8	PARP1/2
TF-palbociclib8	TF-CDK4/6	TF	TF mAb	Native	palbociclib8	CDK4/6
TF-cobimetinib8	TF-MEK	TF	TF mAb	Native	cobimetinib8	MEK
TROP2-belotecan8	TROP2-TOP1	TROP2	Sacituzumab (RS7)	Native	belotecan8	TOP1
B7H3-exatecan8	B7H3-TOP1	B7H3	Ab-010	Native	exatecan8	TOP1
HER2-exatecan2	HER2-TOP1	HER2	thioT	THIOMAB	exatecan2	TOP1
PSMA-exatecan2	PSMA-TOP1	PSMA	thio383	THIOMAB	exatecan2	TOP1
PSMA-exatecan8	PSMA-TOP1	PSMA	Hu383	Native	exatecan8	TOP1
HER3-exatecan8	HER3-TOP1	HER3	Patritumab (P)	Native	exatecan8	TOP1
TF-exatecan8	TF-TOP1	TF	TF mAb	Native	exatecan8	TOP1
CDH6-exatecan8	CDH6-TOP1	CDH6	CDH6 mAb	Native	exatecan8	TOP1
FOLR-exatecan8	FOLR-TOP1	FOLR	Hu151	Native	exatecan8	TOP1
B7H3-GGFG-DXd	B7H3-TOP1	B7H3	HM30	Native	GGFG-DXd	TOP1
B7H3-belotecan8	B7H3-TOP1	B7H3	Ab-010	Native	belotecan8	TOP1
B7H3-exatecan2	B7H3-TOP1	B7H3	thio010	THIOMAB	exatecan2	TOP1
MUC18-exatecan8	MUC18-TOP1	MUC18	Ab15A	Native	exatecan8	TOP1
PSMA-belotecan8	PSMA-TOP1	PSMA	Hu383	Native	belotecan8	TOP1
TROP2-exatecan8	TROP2-TOP1	TROP2	Sacituzumab (RS7)	Native	exatecan8	TOP1
TROP2-CL2A-SN38	TROP2-TOP1	TROP2	Sacituzumab (RS7)	Native	CL2A-SN38	TOP1
TROP2-exatecan4	TROP2-TOP1	TROP2	Sacituzumab (RS7)	Native	exatecan4	TOP1
TROP2-GGFG-DXd	TROP2-TOP1	TROP2	Datopotamab (Dato)	Native	GGFG-DXd	TOP1
HER2-GGFG-DXd	HER2-TOP1	HER2	Trastuzumab (T)	Native	GGFG-DXd	TOP1
PSMA-smol0068	PSMA-GSPT1	PSMA	Hu383	Native	smol0068	GSPT1
HER2-berzosertib8	HER2-ATR	HER2	Trastuzumab (T)	Native	berzosertib8	ATR
HER2-rabusertib8	HER2-CHK1	HER2	Trastuzumab (T)	Native	rabusertib8	CHK1
PSMA-rucaparib8	PSMA-PARP1/2	PSMA	Hu383	Native	rucaparib8	PARP1/2
PSMA-berzosertib8	PSMA-ATR	PSMA	Hu383	Native	berzosertib8	ATR
PSMA-rabusertib8	PSMA-CHK1	PSMA	Hu383	Native	rabusertib8	CHK1
ROR1-exatecan8	ROR1-TOP1	ROR1	Hu517	Native	exatecan8	TOP1
IgG-exatecan8	IgG-TOP1	IgG	Isotype IgG	Native	exatecan8	TOP1
HER2-1V2098	HER2-TLR7	HER2	Trastuzumab (T)	Native	1V2098	TLR7

## Sheet: Table 5-SPARCs
Supplementary Information Table 5 - SPARCs
SPARC Code	Label in Figures	SPARC name	Tumor Antigen	Antibody	MTP	Payload combination (DAR)	Target combination	-	(	)
S1	S1-(TOP1-PARP1/2)	SPARC2-HER2-(Exatecan/TOP1-Rucaparib/PARP1/2)8	HER2	Trastuzumab (T)	MTP2-Exatecan-Rucaparib	(Exatecan-Rucaparib)8	TOP1-PARP1/2
S2	S2-(TOP1-PARP1/2-ATR)	SPARC3-HER2-(Exatecan/TOP1-Rucaparib/PARP1/2-Berzosertib/ATR)8	HER2	Trastuzumab (T)	MTP2-Exatecan-Rucaparib-Berzosertib	(Exatecan-Rucaparib-Berzosertib)8	TOP1-PARP1/2-ATR
S3	S3-(TOP1-CHK1/2-WEE1)	SPARC3-TROP2-(Belotecan/TOP1-Rabusertib/CHK1/2-Huavosertib/WEE1)8	TROP2	Sacituzumab (RS7)	MTP3-Belotecan-Rabusertib-Huavosertib	(Belotecan-Rabusertib-Huavosertib)8	TOP1-CHK1/2-WEE1
S4	S4-(TOP1-PARP1/2)	SPARC2-PSMA-(Belotecan/TOP1-Rucaparib/PARP1/2)8	PSMA	Hu383	MTP2-Belotecan-Rucaparib	(Belotecan-Rucaparib)8	TOP1-PARP1/2
S5	S5-(TOP1-PARP1/2-CHK1/2(Rabu))	SPARC3-PSMA-(Belotecan/TOP1-Rucaparib/PARP1/2-Rabusertib/CHK1/2)8	PSMA	Hu383	MTP3-Belotecan-Rucaparib-Rabusertib	(Belotecan-Rucaparib-Rabusertib)8	TOP1-PARP1/2-CHK1/2(Rabu)
S6	S6-(TOP1-CHK1/2(7762)-WEE1)	SPARC3-PSMA-(Belotecan/TOP1-AZD7762/CHK1/2-Huavosertib/WEE1)8	PSMA	Hu383	MTP3-Belotecan-AZD7762-Huavosertib	(Belotecan-AZD7762-Huavosertib)8	TOP1-CHK1/2(7762)-WEE1
S7	S7-(PARP1/2-ATR)	SPARC2-TROP2-(Rucaparib/PARP1/2-Berzosertib/ATR)8	TROP2	Sacituzumab (RS7)	MTP2-Rucaparib-Berzosertib	(Rucaparib-Berzosertib)8	PARP1/2-ATR
S8	S8-(CHK1/2(7762)-WEE1)	SPARC2-TROP2-(AZD7762/CHK1/2-Huavosertib/WEE1)8	TROP2	Sacituzumab (RS7)	MTP2-AZD7762-Huavosertib	(AZD7762-Huavosertib)8	CHK1/2(7762)-WEE1
S9	S9-(PARP1/2-CHK1/2(Rabu))	SPARC2-TROP2-(Rucaparib/PARP1/2-Rabusertib/CHK1/2)8	TROP2	Sacituzumab (RS7)	MTP2-Rucaparib-Rabusertib	(Rucaparib-Rabusertib)8	PARP1/2-CHK1/2(Rabu)
S10	S10-(WEE1-CHK1/2(Rabu))	SPARC2-TROP2-(Huavosertib/WEE1-Rabusertib/CHK1/2)8	TROP2	Sacituzumab (RS7)	MTP2-Huavosertib-Rabusertib	(Huavosertib-Rabusertib)8	WEE1-CHK1/2(Rabu)
S11	S11-(PARP1/2-CHK1/2(7762))	SPARC2-TROP2-(Rucaparib/PARP1/2-AZD7762/CHK1/2)8	TROP2	Sacituzumab (RS7)	MTP2-Rucaparib-AZD7762	(Rucaparib-AZD7762)8	PARP1/2-CHK1/2(7762)
S12	S12-(CDK4/6-PRMT5)	SPARC2-TF-(Palbociclib/CDK4/6-MRTX1719/PRMT5)8	Tissue Factor	TF mAb	MTP2-Palbociclib-MRTX1719	(Palbociclib-MRTX1719)8	CDK4/6-PRMT5
S13	S13-(Gemcitabine-PRMT5)	SPARC2-TF-(Gemcitabine-MRTX1719/PRMT5)8	Tissue Factor	TF mAb	MTP2-gemcitabine-MRTX1719/PRMT5	(gemcitabine-MRTX1719/PRMT5)8	Gemcitabine-PRMT5
S14	S14-(TOP1-ATR)	SPARC2-HER2-(Exatecan/TOP1-Berzosertib/ATR)8	HER2	Trastuzumab (T)	MTP2-Exatecan-Berzosertib	(Exatecan-Berzosertib)8	TOP1-ATR
S15	S15-(TOP1-PARP1/2)	SPARC2-PSMA-(Exatecan/TOP1-Rucaparib/PARP1/2)8	PSMA	Hu383	MTP2-Exatecan-Rucaparib	(Exatecan-Rucaparib)8	TOP1-PARP1/2
S16	S16-(TOP1-PARP1/2)	SPARC2-HER2-(Exatecan/TOP1-Niraparib/PARP1/2)8	HER2	Trastuzumab (T)	MTP2-Exatecan-Niraparib	(Exatecan-Niraparib)8	TOP1-PARP1/2
S17	S17-(TOP1-PARP1/2)	SPARC2-PSMA-(Exatecan/TOP1-Niraparib/PARP1/2)8	PSMA	Hu383	MTP2-Exatecan-Niraparib	(Exatecan-Niraparib)8	TOP1-PARP1/2
S18	S18-(TOP1-ATR)	SPARC2-PSMA-(Exatecan/TOP1-Berzosertib/ATR)8	PSMA	Hu383	MTP2-Exatecan-Berzosertib	(Exatecan-Berzosertib)8	TOP1-ATR
S19	S19-(TOP1-PARP1)	SPARC2-B7H3-(Exatecan/TOP1-Huaoparib/PARP1)8	B7H3	Ab-010	MTP2-Exatecan-Huaoparib	(Exatecan-Huaoparib)8	TOP1-PARP1
S20	S20-(TOP1-PARP1/2)	SPARC2-B7H3-(Exatecan/TOP1-Rucaparib/PARP1/2)8	B7H3	Ab-010	MTP2-Exatecan-Rucaparib	(Exatecan-Rucaparib)8	TOP1-PARP1/2
S21	S21-(TOP1-PARP1/2)	SPARC2-CDH6-(Exatecan/TOP1-Rucaparib/PARP1/2)8	CDH6	CDH6 mAb	MTP2-Exatecan-Rucaparib	(Exatecan-Rucaparib)8	TOP1-PARP1/2
S22	S22-(TOP1-PARP1/2)	SPARC2-FRa-(Exatecan/TOP1-Rucaparib/PARP1/2)8	FRa	Hu151	MTP2-Exatecan-Rucaparib	(Exatecan-Rucaparib)8	TOP1-PARP1/2
S23	S23-(TOP1-PARP1/2)	SPARC2-ROR1-(Exatecan/TOP1-Rucaparib/PARP1/2)4	ROR1	Hu517	MTP2-Exatecan-Rucaparib	(Exatecan-Rucaparib)8	TOP1-PARP1/2
S24	S24-(TOP1-PARP1/2)	SPARC2-ROR1-(Exatecan/TOP1-Niraparib/PARP1/2)4	ROR1	Hu517	MTP2-Exatecan-Niraparib	(Exatecan-Niraparib)8	TOP1-PARP1/2
S25	S25-(TOP1-PARP1/2-ATR)	SPARC3-TROP2-(Belotecan/TOP1-Rucaparib/PARP1/2-Berzosertib/ATR)8	TROP2	Sacituzumab (RS7)	MTP3-Belotecan-Rucaparib-Berzosertib	(Belotecan-Rucaparib-Berzosertib)8	TOP1-PARP1/2-ATR
S26	S26-(TOP1-PARP1/2)	SPARC2-TROP2-(Belotecan/TOP1-rucaparib/PARP1/2)8	TROP2	Sacituzumab (RS7)	MTP2-Belotecan-Rucaparib	(Belotecan-Rucaparib)8	TOP1-PARP1/2
S27	S27-(TOP1-PARP1/2)	SPARC3-PSMA-(Exatecan/TOP1-Rucaparib/PARP1/2-Rucaparib/PARP1/2)2	PSMA	thio383	MTP3-Exatecan-Rucaparib-Rucaparib	(Exatecan-Rucaparib-Rucaparib)2	TOP1-PARP1/2
S28	S28-(TOP1-PARP1/2)	SPARC2-PSMA-(Exatecan/TOP1-Rucaparib/PARP1/2-Rucaparib/PARP1/2)2-(Rucaparib/PARP1/2-Rucaparib/PARP1/2)8	PSMA	thio383	MTP3-Exatecan-Rucaparib-Rucaparib, MTP2-Rucaparib-Rucaparib	(Exatecan-Rucaparib-Rucaparib)2, (Rucaparib-Rucaparib)8	TOP1-PARP1/2
S29	S29-(TOP1-PARP1/2)	SPARC2-B7H3-(Exatecan/TOP1)2-(Rucaparib/PARP1/2-Rucaparib/PARP1/2)8	B7H3	thio010	T1000-Exatecan, MTP2-Rucaparib-Rucaparib	(Exatecan)2, (Rucaparib-Rucaparib)8	TOP1-PARP1/2
S30	S30-(TOP1-Gemcitabine)(1:2)	SPARC2-B7H3-(Exatecan/TOP1-Exatecan/TOP1)2-(Gemcitabine)8	B7H3	thio010	MTP2-Exatecan-Exatecan, T1000-Gemcitabine	(Exatecan-Exatecan)2, (Gemcitabine)8	TOP1-Gemcitabine
S31	S31-(TOP1-Gemcitabine)(1:1)	SPARC2-B7H3-(Exatecan/TOP1-Gemcitabine)2	B7H3	thio010	MTP2-Exatecan-Gemcitabine	(Exatecan-Gemcitabine)2	TOP1-Gemcitabine
S32	S32-(TOP1-Gemcitabine)(1:5)	SPARC2-B7H3-(Exatecan/TOP1-Gemcitabine)2-(Gemcitabine)8	B7H3	thio010	MTP2-Exatecan-Gemcitabine, T1000-Gemcitabine	(Exatecan-Gemcitabine)2, (Gemcitabine)8	TOP1-Gemcitabine
S33	S33-(TOP1-TLR7)	SPARC2-HER2-(Exatecan/TOP1-1V209P/TLR7)8	HER2	Trastuzumab (T)	MTP2-Exatecan-1V209P	(Exatecan-IV209P)8	TOP1-TLR7
S34	S34-(TOP1-PARP1/2)	SPARC2-MUC18-(Exatecan/TOP1-Rucaparib/PARP1/2)8	MUC18	Ab15A	MTP2-Exatecan-Rucaparib	(Exatecan-Rucaparib)8	TOP1-PARP1/2
S35	S35-(CDK4/6-MEK-EZH2)	SPARC2-CDH3-(Palbociclib/CDK4/6-Cobimetinib/MEK)8	CDH3	Hu445	MTP2-Palbociclib-Cobimetinib	(Palbociclib-Cobimetinib)8	CDK4/6-MEK-EZH2
S36	S36-(CDK4/6-MEK-EZH2)	SPARC3-CDH3-(Palbociclib/CDK4/6-Cobimetinib/MEK-GSK126/EZH2)8	CDH3	Hu445	MTP3-Palbociclib-Cobimetinib-GSK126	(Palbociclib-Cobimetinib-GSK126)8	CDK4/6-MEK-EZH2
S37	S37-(TOP1-PARP1/2)	SPARC2-B7H3-(Exatecan/TOP1)2-(Rucaparib/PARP1/2)8	B7H3	thio010	T1000-Exatecan, T1000-Rucaparib	(Exatecan)2, (Rucaparib)8	TOP1-PARP1/2
S38	S38-(TOP1-PARP1/2)	SPARC2-B7H3-(Exatecan/TOP1-Rucaparib/PARP1/2)2	B7H3	thio010	MTP2-Exatecan-Rucaparib	(Exatecan-Rucaparib)2	TOP1-PARP1/2
S39	S39-(TOP1-PARP1/2)	SPARC2-B7H3-(Exatecan/TOP1-Rucaparib/PARP1/2-Rucaparib/PARP1/2)2	B7H3	thio010	MTP3-Exatecan-Rucaparib-Rucaparib	(Exatecan-Rucaparib-Rucaparib)2	TOP1-PARP1/2
S40	S40-(TOP1-PARP1/2)	SPARC2-B7H3-(Exatecan/TOP1-Rucaparib/PARP1/2-Rucaparib/PARP1/2)2-(Rucaparib/PARP1/2-Rucaparib/PARP1/2)8	B7H3	thio010	MTP3-Exatecan-Rucaparib-Rucaparib, MTP2-Rucaparib-Rucaparib	(Exatecan-Rucaparib-Rucaparib)2, (Rucaparib-Rucaparib)8	TOP1-PARP1/2
S41	S41-(TOP1-GSPT1)	SPARC2-PSMA-(Exatecan/TOP1-Smol006/GSPT1)8	PSMA	Hu383	MTP2-Exatecan-Smol006	(Exatecan-Smol006)8	TOP1-GSPT1
S42	S42-(TOP1-PARP1/2-GSPT1)	SPARC3-PSMA-(Exatecan/TOP1-Rucaparib/PARP1/2-Smol006/GSPT1)8	PSMA	Hu383	MTP3-Exatecan-Rucaparib-Smol006	(Exatecan-Rucaparib-Smol006)8	TOP1-PARP1/2-GSPT1
S43	S43-(TOP1-PARP1/2-ATR)	SPARC3-PSMA-(Exatecan/TOP1-Rucaparib/PARP1/2-Berzosertib/ATR)8	PSMA	Hu383	MTP3-Exatecan-Rucaparib-Berzosertib	(Exatecan-Rucaparib-Berzosertib)8	TOP1-PARP1/2-ATR
S44	S44-(TOP1-PARP1/2-PARP1/2)	SPARC2-PSMA-(Exatecan/TOP1-Rucaparib/PARP1/2-Rucaparib/PARP1/2)8	PSMA	Hu383	MTP3-Exatecan-Rucaparib-Rucaparib	(Exatecan-Rucaparib-Rucaparib)8	TOP1-PARP1/2-PARP1/2
S45	S45-(TOP1-PARP1/2-CHK1/2)	SPARC3-PSMA2-(Exatecan/TOP1-Rucaparib/PARP1/2-Rabusertib/CHK1/2)8	PSMA	Hu383	MTP3-Exatecan-Rucaparib-Rabusertib	(Exatecan-Rucaparib-Rabusertib)8	TOP1-PARP1/2-CHK1/2
S46	S46-(TOP1-CHK1/2-WEE1)	SPARC3-PSMA2-(Exatecan/TOP1-Rabusertib/CHK1/2-Huavosertib/WEE1)8	PSMA	Hu383	MTP3-Eaxtecan-Rabusertib-Huavosertib	(Eaxtecan-Rabusertib-Huavosertib)8	TOP1-CHK1/2-WEE1
S47	S47-(TOP1-PARP1/2-ATR)	SPARC3-PSMA-(Exatecan/TOP1-Exatecan/TOP1)2-(Rucaparib/PARP1/2-Berzosertib/ATR)8	PSMA	thio383	MTP2-Exatecan-Exatecan, MTP2-Rucaparib-Berzosertib	(Exatecan-Exatecan)2, (Rucaparib-Berzosertib)8	TOP1-PARP1/2-ATR
S48	S48-(TOP1-PLK1-ATR)	SPARC3-PSMA-(Exatecan/TOP1-Exatecan/TOP1)2-(Huaposertib/PARP1/2-Berzosertib/ATR)8	PSMA	thio383	MTP2-Exatecan-Exatecan, MTP2-Huaposertib-Berzosertib	(Exatecan-Exatecan)2, (Huaposertib-Berzosertib)8	TOP1-PLK1-ATR
S49	S49-(TOP1-PARP1/2-PLK1-ATR)	SPARC4-PSMA-(Exatecan/TOP1-Exatecan/TOP1)2-(Rucaparib/PARP1/2-Huaposertib/PLK1-Berzosertib/ATR)8	PSMA	thio383	MTP2-Exatecan-Exatecan, MTP3-Rucaparib-Huaposertib-Berzosertib	(Exatecan-Exatecan)2, (Rucaparib-Huaposertib-Berzosertib)8	TOP1-PARP1/2-PLK1-ATR
S50	S50-(TOP1-PLK1-CDKs)	SPARC3-PSMA-(Exatecan/TOP1-Exatecan/TOP1)2-(Huaposertib/PLK1-Dinaciclib/CDKs)8	PSMA	thio383	MTP2-Exatecan-Exatecan, MTP2-Huaposertib-Dinaciclib	(Exatecan-Exatecan)2, (Huaposertib-Dinaciclib)8	TOP1-PLK1-CDKs
S51	S51-(TOP1-PLK1-CDKs-ATR)	SPARC4-PSMA-(Exatecan/TOP1-Exatecan/TOP1)2-(Huaposertib/PLK1-Dinaciclib/CDKs-Berzosertib/ATR)8	PSMA	thio383	MTP2-Exatecan-Exatecan, MTP3-Huaposertib-Dinaciclib-Berzosertib	(Exatecan-Exatecan)2, (Huaposertib-Dinaciclib-Berzosertib)8	TOP1-PLK1-CDKs-ATR
S52	S52-(TOP1-PARP1/2-ATR-CDK4/6-ER-PI3K)	SPARC6-TROP2-(Exatecan/TOP1-Rucaparib/PARP1/2-Berzosertib/ATR)2-(Palbociclib/CDK4/6-Elacestrant/ER-Huaolisib/PI3K)8	TROP2	thioRS7	MTP3-Exatecan-Rucaparib-Berzosertib, MTP3-Palbociclib-Elacestrant-Huaolisib	(Exatecan-Rucaparib-Berzosertib)2, (Palbociclib-Elacestrant-Huaolisib)8	TOP1-PARP1/2-ATR-CDK4/6-ER-PI3K
S53	S53-(TOP1-PLK1-CDKs-ATR)	SPARC4-TROP2-(Exatecan/TOP1-Exatecan/TOP1)2-(Huaposertib/PLK1-Dinaciclib/CDKs-Berzosertib/ATR)8	TROP2	thioRS7	MTP2-Exatecan-Exatecan, MTP3-Huaposertib-Dinaciclib-Berzosertib	(Exatecan-Exatecan)2, (Huaposertib-Dinaciclib-Berzosertib)8	TOP1-PLK1-CDKs-ATR
S54	S54-(TOP1-PARP1/2-PLK1-CDKs)	SPARC4-TROP2-(Exatecan/TOP1-Rucaparib/PARP1/2)2-(Huaposertib/PLK1-Dinaciclib/CDKs)8	TROP2	thioRS7	MTP2-Exatecan-Rucaparib, MTP2-Huaposertib-Dinaciclib	(Exatecan-Rucaparib)2, (Huaposertib-Dinaciclib)8	TOP1-PARP1/2-PLK1-CDKs
S55	S55-(TOP1-PARP1/2-PLK1-CDKs)	SPARC4-TROP2-(Exatecan/TOP1)2-(Rucaparib/PARP1/2-Huaposertib/PLK1-Dinaciclib/CDKs)8	TROP2	thioRS7	T1000-Exatecan, MTP3-Rucaparib-Huaposertib-Dinaciclib	(Exatecan)2, (Rucaparib-Huaposertib-Dinaciclib)8	TOP1-PARP1/2-PLK1-CDKs
S56	S56-(TOP1-ATR-PLK1-CDKs)	SPARC4-TROP2-(Exatecan/TOP1-Berzosertib/ATR)2-(Huaposertib/PLK1-Dinaciclib/CDKs)8	TROP2	thioRS7	MTP-Exatecan-Berzosertib, MTP-Huaposertib-Dinaciclib	(Exatecan-Berzosertib)2, (Huaposertib-Dinaciclib)8	TOP1-ATR-PLK1-CDKs
S57	S57-(TOP1-PLK1-CDKs)	SPARC3-TROP2-(Exatecan/TOP1-Exatecan/TOP1)2-(Huaposertib/PLK1-Dinaciclib/CDKs)8	TROP2	thioRS7	MTP2-Exatecan-Exatecan, MTP2-Huaposertib-Dinaciclib	(Exatecan-Exatecan)2, (Huaposertib-Dinaciclib)8	TOP1-PLK1-CDKs
S58	S58-(TOP1-PLK1-CDKs)	SPARC3-TROP2-(Exatecan/TOP1)2-(Huaposertib/PLK1-Dinaciclib/CDKs)8	TROP2	thioRS7	T1000-Exatecan, MTP2-Huaposertib-Dinaciclib	(Exatecan)2, (Huaposertib-Dinaciclib)8	TOP1-PLK1-CDKs
S59	S59-(PLK1-CDKs)	SPARC2-TROP2-(Huaposertib/PLK1-Dinaciclib/CDKs)8	TROP2	Sacituzumab (RS7)	MTP2-Huaposertib-Dinaciclib	(Huaposertib-Dinaciclib)8	PLK1-CDKs
S60	S60-(TOP1-PLK1-CDKs)	SPARC3-HER2-(Exatecan/TOP1-Exatecan/TOP1)2-(Huaposertib/PLK1-Dinaciclib/CDKs)8	HER2	Thio-trastuzumab (thioT)	MTP2-Exatecan-Exatecan, MTP3-Huaposertib-Dinaciclib-Berzosertib	(Exatecan-Exatecan)2, (Huaposertib-Dinaciclib-Berzosertib)8	TOP1-PLK1-CDKs
S61	S61-(TOP1-CHK1/2-WEE1-PARP1/2-PLK1-CDKs)	SPARC6-TROP2-(Exatecan/TOP1-Rabusertib/CHK1/2-Huavosertib/WEE1)2-(Rucaparib/PARP1-Huaposertib/PLK1-Dinaciclib/CDKs)8	TROP2	thioRS7	MTP3-Exatecan-Rabusertib-Huavosertib, MTP3-Rucaparib-Huaposertib-Dinaciclib	(Exatecan-Rabusertib-Huavosertib)2, (Rucaparib-Huaposertib-Dinaciclib)8	TOP1-CHK1/2-WEE1-PARP1/2-PLK1-CDKs
S62	S62-(TOP1-PARP1/2)	SPARC2-HER2-(Exatecan/TOP1-Veliparib/PARP1/2)8	HER2	Trastuzumab (T)	MTP2-Exatecan-Veliparib	(Exatecan-Veliparib)8	TOP1-PARP1/2
S63	S63-(TOP1-CHK1/2)	SPARC2-HER2-(Exatecan/TOP1-Prexasertib/CHK1/2)8	HER2	Trastuzumab (T)	MTP2-Eaxtecan-Prexasertib	(Eaxtecan-Prexasertib)8	TOP1-CHK1/2
S64	S64-(TOP1-PARP1/2)	SPARC2-PSMA-(Exatecan/TOP1-Veliparib/PARP1/2)8	PSMA	Hu383	MTP2-Exatecan-Veliparib	(Exatecan-Veliparib)8	TOP1-PARP1/2
S65	S65-(TOP1-ATR-PARP1/2)	SPARC3-B7H3-(Exatecan/TOP1)2-(Berzosertib/ATR-Rucaparib/PARP1/2)8	B7H3	thio010	T1000-Exatecan, T1000-Rucaparib	(Exatecan)2, (Berzosertib-Rucaparib)8	TOP1-ATR-PARP1/2
S66	S66-(TOP1-ATR-PARP1)	SPARC3-B7H3-(Exatecan/TOP1)2-(Berzosertib/ATR-Huaoparib/PARP1)8	B7H3	thio010	T1000-Exatecan, T1000-Rucaparib	(Exatecan)2, (Berzosertib-Huaoparib)8	TOP1-ATR-PARP1
S67	S67-(TOP1-PARP1/2)	SPARC2-IgG-(Exatecan/TOP1-Rucaparib/PARP1/2)8	NA	hIgG	MTP2-Exatecan-Rucaparib	(Exatecan-Rucaparib)8	TOP1-PARP1/2
S68	S68-(TOP1-PARP1/2-ATR)	SPARC3-IgG-(Exatecan/TOP1-Rucaparib/PARP1/2-Berzosertib/ATR)8	NA	hIgG	MTP3-Exatecan-Rucaparib-Berzosertib	(Exatecan-Rucaparib-Berzosertib)8	TOP1-PARP1/2-ATR
S69	S69-(CDK4/6-MEK)	SPARC2-IgG-(Palbociclib/CDK4/6-Cobimetinib/MEK)8	NA	hIgG	MTP2-Palbociclib-Cobimetinib	(Palbociclib-Cobimetinib)8	CDK4/6-MEK
S70	S70-(TOP1-Gemcitabine)	SPARC2-IgG-(Exatecan/TOP1-Gemcitabine)8	NA	hIgG	MTP2-Exatecan-Gemcitabine	(Exatecan-Gemcitabine)8	TOP1-Gemcitabine
S71	S71-(TOP1-GSPT1-PLK1-CDKs)	SPARC4-TROP2-(Exatecan/TOP1-Smol006/GSPT1)2-(Huaposertib/PLK1-Dinaciclib/CDKs)8	TROP2	thioRS7	MTP2-Exatecan-Smol006, MTP2-Huaposertib-Dinaciclib	(Exatecan-Smol006)2, (Huaposertib-Dinaciclib)8	TOP1-GSPT1-PLK1-CDKs
S72	S72-(TOP1-PARP1/2-ATR-PLK1-CDKs)	SPARC5-TROP2-(Exatecan/TOP1-Rucaparib/PARP1/2-Berzosertib/ATR)2-(Huaposertib/PLK1-Dinaciclib/CDKs)8	TROP2	thioRS7	MTP3-Exatecan-Rucaparib-Berzosertib, MTP2-Huaposertib-Dinaciclib	(Exatecan-Rucaparib-Berzosertib)2, (Huaposertib-Dinaciclib)8	TOP1-PARP1/2-ATR-PLK1-CDKs
S73	S73-(PARP1/2-ATR)	SPARC2-HER2-(Rucaparib/PARP1/2-Berzosertib/ATR)8	HER2	Trastuzumab (T)	MTP2-Rucaparib-Berzosertib	(Rucaparib-Berzosertib)8	PARP1/2-ATR
S74	S74-(TOP1-CHK1/2)	SPARC2-HER2-(Exatecan/TOP1-Rabusertib/CHK1/2)8	HER2	Trastuzumab (T)	MTP2-Eaxtecan-Rabusertib	(Eaxtecan-Rabusertib)8	TOP1-CHK1/2
S75	S75-(PARP1/2-ATR)	SPARC2-B7H3-(Rucaparib/PARP1/2-Berzosertib/ATR)8	B7H3	Ab-010	MTP2-Rucaparib-Berzosertib	(Rucaparib-Berzosertib)8	PARP1/2-ATR
S76	S76-(TOP1-CHK1/2-WEE1)	SPARC3-HER2-(Exatecan/TOP1-Rabusertib/CHK1/2-Huavosertib/WEE1)8	HER2	Trastuzumab (T)	MTP3-Eaxtecan-Rabusertib-Huavosertib	(Eaxtecan-Rabusertib-Huavosertib)8	TOP1-CHK1/2-WEE1
S77	S77-(TOP1-PARP1/2-CHK1/2)	SPARC3-HER2-(Exatecan/TOP1-Rucaparib/PARP1/2-Rabusertib/CHK1/2)8	HER2	Trastuzumab (T)	MTP3-Exatecan-Rucaparib-Rabusertib	(Exatecan-Rucaparib-Rabusertib)8	TOP1-PARP1/2-CHK1/2
S78	S78-(TOP1-PARP1/2)	SPARC2-HER2-(Exatecan/TOP1-Rucaparib/PARP1/2-Rucaparib/PARP1/2)8	HER2	Trastuzumab (T)	MTP3-Exatecan-Rucaparib-Rucaparib	(Exatecan-Rucaparib-Rucaparib)8	TOP1-PARP1/2
S79	S79-(TOP1-CHK1/2-WEE1)	SPARC3-B7H3-(Exatecan/TOP1-Rabusertib/CHK1/2-Huavosertib/WEE1)8	B7H3	Ab-010	MTP3-Eaxtecan-Rabusertib-Huavosertib	(Eaxtecan-Rabusertib-Huavosertib)8	TOP1-CHK1/2-WEE1
S80	S80-(TOP1-PARP1/2-CHK1/2)	SPARC3-B7H3-(Exatecan/TOP1-Rucaparib/PARP1/2-Rabusertib/CHK1/2)8	B7H3	Ab-010	MTP3-Exatecan-Rucaparib-Rabusertib	(Exatecan-Rucaparib-Rabusertib)8	TOP1-PARP1/2-CHK1/2
S81	S81-(TOP1-PARP1/2)	SPARC2-B7H3-(Exatecan/TOP1-Rucaparib/PARP1/2-Rucaparib/PARP1/2)8	B7H3	Ab-010	MTP3-Exatecan-Rucaparib-Rucaparib	(Exatecan-Rucaparib-Rucaparib)8	TOP1-PARP1/2
S82	S82-(TOP1-PARP1/2-ATR)	SPARC3-B7H3-(Exatecan/TOP1-Rucaparib/PARP1/2-Berzosertib/ATR)8	B7H3	Ab-010	MTP3-Exatecan-Rucaparib-Berzosertib	(Exatecan-Rucaparib-Berzosertib)8	TOP1-PARP1/2-ATR
S83	S83-(TOP1-PARP1/2)	SPARC2-HER2-(Exatecan/TOP1-Rucaparib/PARP1/2)2	HER2	Thio-trastuzumab (thioT)	MTP2-Exatecan-Rucaparib	(Exatecan-Rucaparib)2	TOP1-PARP1/2
S84	S84-(TOP1-PARP1/2)	SPARC2-HER2-(Exatecan/TOP1-Rucaparib/PARP1/2-Rucaparib/PARP1/2)2	HER2	Thio-trastuzumab (thioT)	MTP3-Exatecan-Rucaparib-Rucaparib	(Exatecan-Rucaparib-Rucaparib)2	TOP1-PARP1/2
S85	S85-(TOP1-PARP1/2)	SPARC2-HER2-(Exatecan/TOP1)2-(Rucaparib/PARP1/2)8	HER2	Thio-trastuzumab (thioT)	T1000-Exatecan, T1000-Rucaparib	(Exatecan)2, (Rucaparib)8	TOP1-PARP1/2
S86	S86-(TOP1-PARP1/2)	SPARC2-HER2-(Exatecan/TOP1)2-(Rucaparib/PARP1/2-Rucaparib/PARP1/2)8	HER2	Thio-trastuzumab (thioT)	T1000-Exatecan, MTP2-Rucaparib-Rucaparib	(Exatecan)2, (Rucaparib-Rucaparib)8	TOP1-PARP1/2
S87	S87-(TOP1-PARP1/2)	SPARC2-HER2-(Exatecan/TOP1-Rucaparib/PARP1/2-Rucaparib/PARP1/2)2-(Rucaparib/PARP1/2-Rucaparib/PARP1/2)8	HER2	Thio-trastuzumab (thioT)	MTP3-Exatecan-Rucaparib-Rucaparib, MTP2-Rucaparib-Rucaparib	(Exatecan-Rucaparib-Rucaparib)2, (Rucaparib-Rucaparib)8	TOP1-PARP1/2
S88	S88-(TOP1-PARP1/2)	SPARC2-PSMA-(Exatecan/TOP1-Rucaparib/PARP1/2)2	PSMA	thio383	MTP2-Exatecan-Rucaparib	(Exatecan-Rucaparib)2	TOP1-PARP1/2
S89	S89-(TOP1-PARP1/2)	SPARC2-PSMA-(Exatecan/TOP1)2-(Rucaparib/PARP1/2)8	PSMA	thio383	T1000-Exatecan, T1000-Rucaparib	(Exatecan)2, (Rucaparib)8	TOP1-PARP1/2
S90	S90-(TOP1-PARP1/2)	SPARC2-PSMA-(Exatecan/TOP1)2-(Rucaparib/PARP1/2-Rucaparib/PARP1/2)8	PSMA	thio383	T1000-Exatecan, MTP2-Rucaparib-Rucaparib	(Exatecan)2, (Rucaparib-Rucaparib)8	TOP1-PARP1/2
S91	S91-(TOP1-PARP1/2)	SPARC2-HER2-(Exatecan/TOP1-Huaoparib/PARP1)8	HER2	Trastuzumab (T)	MTP2-Exatecan-Huaoparib	(Exatecan-Huaoparib)8	TOP1-PARP1/2
S92	S92-(TOP1-PARP1/2)	SPARC2-HER2-(Belotecan/TOP1-Rucaparib/PARP1/2)8	HER2	Trastuzumab (T)	MTP2-Belotecan-Rucaparib	(Belotecan-Rucaparib)8	TOP1-PARP1/2
S93	S93-(TOP1-PARP1/2)	SPARC2-HER2-(Belotecan/TOP1-Niraparib/PARP1/2)8	HER2	Trastuzumab (T)	MTP2-Belotecan-Niraparib	(Belotecan-Niraparib)8	TOP1-PARP1/2
S94	S94-(TOP1-PARP1/2)	SPARC2-HER2-(Belotecan/TOP1-Huaoparib/PARP1)8	HER2	Trastuzumab (T)	MTP2-Belotecan-Huaoparib	(Belotecan-Huaoparib)8	TOP1-PARP1/2
S95	S95-(TOP1-PARP1/2)	SPARC2-HER3-(Exatecan/TOP1-Rucaparib/PARP1/2)8	HER3	Patritumab (P)	MTP2-Exatecan-Rucaparib	(Exatecan-Rucaparib)8	TOP1-PARP1/2
S96	S96-(TOP1-PARP1/2)	SPARC2-HER3-(Exatecan/TOP1-Niraparib/PARP1/2)8	HER3	Patritumab (P)	MTP2-Exatecan-Niraparib	(Exatecan-Niraparib)8	TOP1-PARP1/2
S97	S97-(TOP1-PARP1/2)	SPARC2-HER3-(Exatecan/TOP1-Huaoparib/PARP1)8	HER3	Patritumab (P)	MTP2-Exatecan-Huaoparib	(Exatecan-Huaoparib)8	TOP1-PARP1/2
S98	S98-(TOP1-PARP1/2)	SPARC2-HER3-(Belotecan/TOP1-Rucaparib/PARP1/2)8	HER3	Patritumab (P)	MTP2-Belotecan-Rucaparib	(Belotecan-Rucaparib)8	TOP1-PARP1/2
S99	S99-(TOP1-PARP1/2)	SPARC2-HER3-(Belotecan/TOP1-Niraparib/PARP1/2)8	HER3	Patritumab (P)	MTP2-Belotecan-Niraparib	(Belotecan-Niraparib)8	TOP1-PARP1/2
S100	S100-(TOP1-PARP1/2)	SPARC2-HER3-(Belotecan/TOP1-Huaoparib/PARP1)8	HER3	Patritumab (P)	MTP2-Belotecan-Huaoparib	(Belotecan-Huaoparib)8	TOP1-PARP1/2
S101	S101-(TOP1-PARP1/2)	SPARC2-B7H3-(Exatecan/TOP1-Niraparib/PARP1/2)8	B7H3	Ab-010	MTP2-Exatecan-Niraparib	(Exatecan-Niraparib)8	TOP1-PARP1/2
S102	S102-(TOP1-PARP1/2)	SPARC2-B7H3-(Belotecan/TOP1-Rucaparib/PARP1/2)8	B7H3	Ab-010	MTP2-Belotecan-Rucaparib	(Belotecan-Rucaparib)8	TOP1-PARP1/2
S103	S103-(TOP1-PARP1/2)	SPARC2-TF-(Exatecan/TOP1-Rucaparib/PARP1/2)8	Tissue Factor	TF mAb	MTP-Exatecan-Rucaparib	(Exatecan-Rucaparib)8	TOP1-PARP1/2
S104	S104-(TOP1-PARP1/2)	SPARC2-TF-(Exatecan/TOP1-Niraparib/PARP1/2)8	Tissue Factor	TF mAb	MTP2-Exatecan-Niraparib	(Exatecan-Niraparib)8	TOP1-PARP1/2
S105	S105-(TOP1-PARP1/2)	SPARC2-TF-(Exatecan/TOP1-Huaoparib/PARP1)8	Tissue Factor	TF mAb	MTP2-Exatecan-Huaoparib	(Exatecan-Huaoparib)8	TOP1-PARP1/2
S106	S106-(TOP1-PARP1/2)	SPARC2-TF-(Belotecan/TOP1-Rucaparib/PARP1/2)8	Tissue Factor	TF mAb	MTP2-Belotecan-Rucaparib	(Belotecan-Rucaparib)8	TOP1-PARP1/2
S107	S107-(TOP1-PARP1/2)	SPARC2-TF-(Belotecan/TOP1-Huaoparib/PARP1)8	Tissue Factor	TF mAb	MTP2-Belotecan-Huaoparib	(Belotecan-Huaoparib)8	TOP1-PARP1/2
S108	S108-(TOP1-PARP1/2)	SPARC2-PSMA-(Exatecan/TOP1-Huaoparib/PARP1)8	PSMA	Hu383	MTP2-Exatecan-Huaoparib	(Exatecan-Huaoparib)8	TOP1-PARP1/2
S109	S109-(TOP1-PARP1/2)	SPARC2-PSMA-(Belotecan/TOP1-Huaoparib/PARP1)8	PSMA	Hu383	MTP2-Belotecan-Huaoparib	(Belotecan-Huaoparib)8	TOP1-PARP1/2
S110	S110-(TOP1-PARP1/2)	SPARC2-CDH6-(Exatecan/TOP1-Niraparib/PARP1/2)8	CDH6	CDH6 mAb	MTP2-Exatecan-Niraparib	(Exatecan-Niraparib)8	TOP1-PARP1/2
S111	S111-(TOP1-PARP1/2)	SPARC2-FRa-(Exatecan/TOP1-Niraparib/PARP1/2)8	FRa	Hu151	MTP2-Exatecan-Niraparib	(Exatecan-Niraparib)8	TOP1-PARP1/2
S112	S112-(TOP1-CHK1/2)	SPARC2-PSMA-(Exatecan/TOP1-Prexasertib/CHK1/2)8	PSMA	Hu383	MTP2-Eaxtecan-Prexasertib	(Eaxtecan-Prexasertib)8	TOP1-CHK1/2
S113	S113-(TOP1-ATR)	SPARC2-CDH6-(Exatecan/TOP1-Berzosertib/ATR)8	CDH6	CDH6 mAb	MTP2-Exatecan-Berzosertib	(Exatecan-Berzosertib)8	TOP1-ATR
S114	S114-(TOP1-ATR)	SPARC2-FRa-(Exatecan/TOP1-Berzosertib/ATR)8	FRa	Hu151	MTP2-Exatecan-Berzosertib	(Exatecan-Berzosertib)8	TOP1-ATR
S115	S115-(TOP1-PARP1/2-CHK1/2)	SPARC3-TROP2-(Belotecan/TOP1-Rucaparib/PARP1/2-Rabusertib/CHK1/2)8	TROP2	Sacituzumab (RS7)	MTP3-Belotecan-Rucaparib-Rabusertib	(Belotecan-Rucaparib-Rabusertib)8	TOP1-PARP1/2-CHK1/2
S116	S116-(TOP1-PARP1/2-ATR-CDKs-MEK)	SPARC5-TROP2-(Exatecan/TOP1-Rucaparib/PARP1/2-Berzosertib/ATR)2-(Dinaciclib/CDKs-Huametinib/MEK)8	TROP2	thioRS7	MTP3-Exatecan-Rucaparib-Berzosertib, MTP2-Dinaciclib-Huametinib	(Exatecan-Rucaparib-Berzosertib)2, (Dinaciclib-Huametinib)8	TOP1-PARP1/2-ATR-CDKs-MEK
S117	S117-(TOP1-PARP1/2)	SPARC2-TROP2-(Exatean/TOP1-Rucaparib/PARP1/2)8	TROP2	Sacituzumab (RS7)	MTP2-Exatean-Rucaparib	(Exatean-Rucaparib)8	TOP1-PARP1/2
S118	S118-(TOP1-PARP1/2-ATR)	SPARC3-TROP2-(Exatecan/TOP1-Rucaparib/PARP1/2-Berzosertib/ATR)8	TROP2	Sacituzumab (RS7)	MTP3-Exatecan-Rucaparib-Berzosertib	(Exatecan-Rucaparib-Berzosertib)8	TOP1-PARP1/2-ATR
S119	S119-(CDK4/6-MEK)	SPARC2-TF-(Palbociclib/CDK4/6-Cobimetinib/MEK)8	Tissue Factor	TF mAb	MTP2-Palbociclib-Cobimetinib	(Palbociclib-Cobimetinib)8	CDK4/6-MEK
S120	S120-(TOP1-PARP1/2-ATR)	SPARC3-PSMA-(Exatecan/TOP1)2-(Rucaparib/PARP1/2-Berzosertib/ATR)8	PSMA	thio383	T1000-Exatecan, MTP3-Rucaparib-Rabusertib-Berzosertib	(Exatecan)2, (Rucaparib-Berzosertib)8	TOP1-PARP1/2-ATR
*, S1 is also named as T-DTP-(Exatecan/TOP1-Rucaparib/PARP1/2)
